# Supplementary material for: Genome-wide CNV investigation suggests a role for cadherin, Wnt, and p53 pathways in primary open-angle glaucoma
Source: BMC Genomics. 2021 Aug 4;22:590. doi: 10.1186/s12864-021-07846-1 (PMC8336345; doi:10.1186/s12864-021-07846-1)
Supplement: Supplementary file 1 — Additional file 1. [file 12864_2021_7846_MOESM1_ESM.xlsx]

## Sheet: Supplementary data 1
Functional classification of the genes identified in the AGS and GLGS-UGLI cohorts.
	Gene ID	Gene name	PANTHER family
AGS
	BRCA2	Breast cancer type 2 susceptibility protein;BRCA2;ortholog	BREAST CANCER TYPE 2 SUSCEPTIBILITY PROTEIN (PTHR11289:SF0)
	NIPBL	Nipped-B-like protein;NIPBL;ortholog	NIPPED-B-LIKE PROTEIN (PTHR21704:SF18)
	SH2B3	SH2B adapter protein 3;SH2B3;ortholog	SH2B ADAPTER PROTEIN 3 (PTHR10872:SF1)
	HLA-DRB1	HLA class II histocompatibility antigen, DRB1 beta chain;HLA-DRB1;ortholog	HLA CLASS II HISTOCOMPATIBILITY ANTIGEN, DRB1 BETA CHAIN (PTHR19944:SF99)
	HLA-DRB5	HLA class II histocompatibility antigen, DR beta 5 chain;HLA-DRB5;ortholog	HLA CLASS II HISTOCOMPATIBILITY ANTIGEN, DR BETA 5 CHAIN (PTHR19944:SF97)
	HLA-DRB6	HLA class II histocompatibility antigen, DR Beta 6 chain;Pseudogene	HLA CLASS II HISTOCOMPATIBILITY ANTIGEN, DR BETA 6 CHAIN
	MFSD8	Major facilitator superfamily domain-containing protein 8;MFSD8;ortholog	MAJOR FACILITATOR SUPERFAMILY DOMAIN-CONTAINING PROTEIN 8 (PTHR23510:SF3)
	COL3A1	Collagen alpha-1(III) chain;COL3A1;ortholog	COLLAGEN ALPHA-1(III) CHAIN (PTHR24023:SF604)
	SCN1A	Sodium channel protein type 1 subunit alpha;SCN1A;ortholog	SODIUM CHANNEL PROTEIN TYPE 1 SUBUNIT ALPHA (PTHR10037:SF280)
	CPTP	Ceramide-1-phosphate transfer protein;CPTP;ortholog	CERAMIDE-1-PHOSPHATE TRANSFER PROTEIN (PTHR10219:SF20)
	APC	Adenomatous polyposis coli protein;APC;ortholog	ADENOMATOUS POLYPOSIS COLI PROTEIN (PTHR12607:SF11)
	EPPK1	Epiplakin;EPPK1;ortholog	EPIPLAKIN (PTHR23169:SF21)
	SDHB	Succinate dehydrogenase [ubiquinone] iron-sulfur subunit, mitochondrial;SDHB;ortholog	SUCCINATE DEHYDROGENASE [UBIQUINONE] IRON-SULFUR SUBUNIT, MITOCHONDRIAL (PTHR11921:SF29)
	PLEC	Plectin;PLEC;ortholog	PLECTIN (PTHR23169:SF20)
	TAS1R3	Taste receptor type 1 member 3;TAS1R3;ortholog	TASTE RECEPTOR TYPE 1 MEMBER 3 (PTHR24061:SF435)
	ZDHHC11	almitoyltransferase ZDHHC11;ZDHHC11;ortholog	PALMITOYLTRANSFERASE ZDHHC11-RELATED (PTHR22883:SF22)
GLGS-UGLI
	PCDHA8	Protocadherin alpha-8;PCDHA8;ortholog	PROTOCADHERIN ALPHA-6-RELATED (PTHR24028:SF305)
	PSG5	Pregnancy-specific beta-1-glycoprotein 5;PSG5;ortholog	PREGNANCY-SPECIFIC BETA-1-GLYCOPROTEIN 11-RELATED (PTHR44337:SF15)
	GJC1	Gap junction gamma-1 protein;GJC1;ortholog	GAP JUNCTION GAMMA-1 PROTEIN (PTHR11984:SF6)
	MSH2	DNA mismatch repair protein Msh2;MSH2;ortholog	DNA MISMATCH REPAIR PROTEIN MSH2 (PTHR11361:SF35)
	PCDHA9	Protocadherin alpha-9;PCDHA9;ortholog	PROTOCADHERIN ALPHA-9 (PTHR24028:SF255)
	BRCA2	Breast cancer type 2 susceptibility protein;BRCA2;ortholog	BREAST CANCER TYPE 2 SUSCEPTIBILITY PROTEIN (PTHR11289:SF0)
	HEATR4	HEAT repeat-containing protein 4;HEATR4;ortholog	HEAT REPEAT-CONTAINING PROTEIN 4 (PTHR12697:SF20)
	PCDHA1	Protocadherin alpha-1;PCDHA1;ortholog	PROTOCADHERIN ALPHA-1 (PTHR24028:SF92)
	HLA-A	HLA class I histocompatibility antigen, A alpha chain;HLA-A;ortholog	HLA CLASS I HISTOCOMPATIBILITY ANTIGEN, A ALPHA CHAIN (PTHR16675:SF229)
	NIPBL	Nipped-B-like protein;NIPBL;ortholog	NIPPED-B-LIKE PROTEIN (PTHR21704:SF18)
	TCF3	Transcription factor 7-like 1;TCF7L1;ortholog	TRANSCRIPTION FACTOR 7-LIKE 1 (PTHR10373:SF25)
	CCL3L1	C-C motif chemokine 3-like 1;CCL3L3;ortholog	C-C MOTIF CHEMOKINE 3-LIKE 1 (PTHR12015:SF151)
	PSG6	Pregnancy-specific beta-1-glycoprotein 6;PSG6;ortholog	PREGNANCY-SPECIFIC BETA-1-GLYCOPROTEIN 4-RELATED (PTHR44427:SF17)
	HRAS	GTPase HRas;HRAS;ortholog	GTPASE HRAS (PTHR24070:SF385)
	PSG3	Pregnancy-specific beta-1-glycoprotein 3;PSG3;ortholog	PREGNANCY-SPECIFIC BETA-1-GLYCOPROTEIN 3 (PTHR44427:SF12)
	ATM	Serine-protein kinase ATM;ATM;ortholog	SERINE-PROTEIN KINASE ATM (PTHR11139:SF72)
	CFTR	Cystic fibrosis transmembrane conductance regulator;CFTR;ortholog	CYSTIC FIBROSIS TRANSMEMBRANE CONDUCTANCE REGULATOR (PTHR24223:SF19)
	HLA-H	Putative HLA class I histocompatibility antigen, alpha chain H;HLA-H;ortholog	HLA CLASS I HISTOCOMPATIBILITY ANTIGEN, ALPHA CHAIN H-RELATED (PTHR16675:SF256)
	SYCP2	Synaptonemal complex protein 2;SYCP2;ortholog	SYNAPTONEMAL COMPLEX PROTEIN 2 (PTHR15607:SF12)
	FOXG1	Forkhead box protein G1;FOXG1;ortholog	FORKHEAD BOX PROTEIN G1 (PTHR46617:SF3)
	HLA-DRB1	HLA class II histocompatibility antigen, DRB1 beta chain;HLA-DRB1;ortholog	HLA CLASS II HISTOCOMPATIBILITY ANTIGEN, DRB1 BETA CHAIN (PTHR19944:SF99)
	PCDHA4	Protocadherin alpha-4;PCDHA4;ortholog	PROTOCADHERIN ALPHA-4 (PTHR24028:SF82)
	CHRFAM7A	CHRNA7-FAM7A fusion protein;CHRFAM7A;ortholog	CHRNA7-FAM7A FUSION PROTEIN-RELATED (PTHR18945:SF890)
	PSG2	Pregnancy-specific beta-1-glycoprotein 2;PSG2;ortholog	PREGNANCY-SPECIFIC BETA-1-GLYCOPROTEIN 11-RELATED (PTHR44337:SF15)
	PRB4	Basic salivary proline-rich protein 4;PRB4;ortholog	BASIC SALIVARY PROLINE-RICH PROTEIN 4 (PTHR23203:SF15)
	ERVV-1	Endogenous retrovirus group V member 1 Env polyprotein;ERVV-1;ortholog	ENDOGENOUS RETROVIRUS GROUP V MEMBER 1 ENV POLYPROTEIN-RELATED (PTHR10424:SF74)
	CEP290	Centrosomal protein of 290 kDa;CEP290;ortholog	CENTROSOMAL PROTEIN OF 290 KDA (PTHR18879:SF20)
	ACOT1	Acyl-coenzyme A thioesterase 1;ACOT1;ortholog	ACYL-COENZYME A THIOESTERASE 1-RELATED (PTHR10824:SF16)
	ACOT2	Acyl-coenzyme A thioesterase 2, mitochondrial;ACOT2;ortholog	ACYL-COENZYME A THIOESTERASE 1-RELATED (PTHR10824:SF16)
	PCDHA5	Protocadherin alpha-5;PCDHA5;ortholog	PROTOCADHERIN ALPHA-5 (PTHR24028:SF111)
	HLA-DRB5	HLA class II histocompatibility antigen, DR beta 5 chain;HLA-DRB5;ortholog	HLA CLASS II HISTOCOMPATIBILITY ANTIGEN, DR BETA 5 CHAIN (PTHR19944:SF97)
	MFSD8	Major facilitator superfamily domain-containing protein 8;MFSD8;ortholog	MAJOR FACILITATOR SUPERFAMILY DOMAIN-CONTAINING PROTEIN 8 (PTHR23510:SF3)
	CD177	CD177 antigen;CD177;ortholog	CD177 ANTIGEN (PTHR16529:SF8)
	FPR2	N-formyl peptide receptor 2;FPR2;ortholog	N-FORMYL PEPTIDE RECEPTOR 2 (PTHR24225:SF0)
	ARHGAP11B	Rho GTPase-activating protein 11B;ARHGAP11B;ortholog	RHO GTPASE-ACTIVATING PROTEIN 11A-RELATED (PTHR15670:SF4)
	RAD50	DNA repair protein RAD50;RAD50;ortholog	DNA REPAIR PROTEIN RAD50 (PTHR18867:SF12)
	HIP1	Huntingtin-interacting protein 1;HIP1;ortholog	HUNTINGTIN-INTERACTING PROTEIN 1 (PTHR10407:SF14)
	PSG4	Pregnancy-specific beta-1-glycoprotein 4;PSG4;ortholog	PREGNANCY-SPECIFIC BETA-1-GLYCOPROTEIN 4-RELATED (PTHR44427:SF17)
	PSG9	Pregnancy-specific beta-1-glycoprotein 9;PSG9;ortholog	PREGNANCY-SPECIFIC BETA-1-GLYCOPROTEIN 9 (PTHR44427:SF14)
	ADAM11	Disintegrin and metalloproteinase domain-containing protein 11;ADAM11;ortholog	DISINTEGRIN AND METALLOPROTEINASE DOMAIN-CONTAINING PROTEIN 11 (PTHR11905:SF114)
	HLA-G	HLA class I histocompatibility antigen, alpha chain G;HLA-G;ortholog	HLA CLASS I HISTOCOMPATIBILITY ANTIGEN, ALPHA CHAIN G (PTHR16675:SF169)
	FPR3	N-formyl peptide receptor 3;FPR3;ortholog	N-FORMYL PEPTIDE RECEPTOR 3 (PTHR24225:SF16)
	FCHSD2	F-BAR and double SH3 domains protein 2;FCHSD2;ortholog	F-BAR AND DOUBLE SH3 DOMAINS PROTEIN 2 (PTHR15735:SF11)
	RHD	Blood group Rh(D) polypeptide;RHD;ortholog	BLOOD GROUP RH(CE) POLYPEPTIDE-RELATED (PTHR11730:SF43)
	BLM	Bloom syndrome protein;BLM;ortholog	BLOOM SYNDROME PROTEIN (PTHR13710:SF105)
	TAS2R43	Taste receptor type 2 member 43;TAS2R43;ortholog	TASTE RECEPTOR TYPE 2 MEMBER 43 (PTHR11394:SF127)
	COL3A1	Collagen alpha-1(III) chain;COL3A1;ortholog	COLLAGEN ALPHA-1(III) CHAIN (PTHR24023:SF604)
	ALG1	Chitobiosyldiphosphodolichol beta-mannosyltransferase;ALG1;ortholog	CHITOBIOSYLDIPHOSPHODOLICHOL BETA-MANNOSYLTRANSFERASE (PTHR13036:SF1)
	APC	Adenomatous polyposis coli protein;APC;ortholog	ADENOMATOUS POLYPOSIS COLI PROTEIN (PTHR12607:SF11)
	MADCAM1	Mucosal addressin cell adhesion molecule 1;MADCAM1;ortholog	MUCOSAL ADDRESSIN CELL ADHESION MOLECULE 1 (PTHR14162:SF1)
	PSG11	Pregnancy-specific beta-1-glycoprotein 11;PSG11;ortholog	PREGNANCY-SPECIFIC BETA-1-GLYCOPROTEIN 11-RELATED (PTHR44337:SF15)
	KIF20B	Kinesin-like protein KIF20B;KIF20B;ortholog	KINESIN-LIKE PROTEIN KIF20B (PTHR24115:SF534)
	TBCK	TBC domain-containing protein kinase-like protein;TBCK;ortholog	TBC DOMAIN-CONTAINING PROTEIN KINASE-LIKE PROTEIN (PTHR22957:SF168)
	SDHB	Succinate dehydrogenase [ubiquinone] iron-sulfur subunit, mitochondrial;SDHB;ortholog	SUCCINATE DEHYDROGENASE [UBIQUINONE] IRON-SULFUR SUBUNIT, MITOCHONDRIAL (PTHR11921:SF29)
	TBC1D3B	TBC1 domain family member 3B;TBC1D3B;ortholog	TBC1 DOMAIN FAMILY MEMBER 3-RELATED (PTHR22957:SF537)
	LARP1B	La-related protein 1B;LARP1B;ortholog	LA-RELATED PROTEIN 1B (PTHR22792:SF50)
	PSG1	Pregnancy-specific beta-1-glycoprotein 1;PSG1;ortholog	PREGNANCY-SPECIFIC BETA-1-GLYCOPROTEIN 1 (PTHR44427:SF16)
	PLK4	Serine/threonine-protein kinase PLK4;PLK4;ortholog	SERINE/THREONINE-PROTEIN KINASE PLK4 (PTHR24345:SF89)
	PCDHA7	Protocadherin alpha-7;PCDHA7;ortholog	PROTOCADHERIN ALPHA-7 (PTHR24028:SF225)
	TMTC3	Protein O-mannosyl-transferase TMTC3;TMTC3;ortholog	PROTEIN O-MANNOSYL-TRANSFERASE TMTC3 (PTHR44395:SF1)
	PSG7	Putative pregnancy-specific beta-1-glycoprotein 7;PSG7;ortholog	PREGNANCY-SPECIFIC BETA-1-GLYCOPROTEIN 7-RELATED (PTHR44427:SF19)
	CCDC73	Coiled-coil domain-containing protein 73;CCDC73;ortholog	COILED-COIL DOMAIN-CONTAINING PROTEIN 73 (PTHR28660:SF1)
	PRB1	Retinoblastoma-like protein 1;RBL1;ortholog	RETINOBLASTOMA-LIKE PROTEIN 1 (PTHR13742:SF20)
	KLRC3	NKG2-E type II integral membrane protein;KLRC3;ortholog	NKG2-E TYPE II INTEGRAL MEMBRANE PROTEIN (PTHR22800:SF239)
	PCDHA2	Protocadherin alpha-2;PCDHA2;ortholog	PROTOCADHERIN ALPHA-2 (PTHR24028:SF60)
	SOS1	Son of sevenless homolog 1;SOS1;ortholog	SON OF SEVENLESS HOMOLOG 1 (PTHR23113:SF168)
	PCDHA6	Protocadherin alpha-6;PCDHA6;ortholog	PROTOCADHERIN ALPHA-6-RELATED (PTHR24028:SF305)
	PTEN	Phosphatidylinositol 3,4,5-trisphosphate 3-phosphatase and dual-specificity protein phosphatase PTEN;PTEN;ortholog	PHOSPHATIDYLINOSITOL 3,4,5-TRISPHOSPHATE 3-PHOSPHATASE AND DUAL-SPECIFICITY PROTEIN PHOSPHATASE PTEN (PTHR12305:SF81)
	PCDHA3	Protocadherin alpha-3;PCDHA3;ortholog	PROTOCADHERIN ALPHA-3 (PTHR24028:SF133)
	MGAM	Maltase-glucoamylase, intestinal;MGAM;ortholog	MALTASE-GLUCOAMYLASE, INTESTINAL (PTHR22762:SF63)
	PCDHA10	Protocadherin alpha-10;PCDHA10;ortholog	PROTOCADHERIN ALPHA-10 (PTHR24028:SF124)
	STK11	Serine/threonine-protein kinase STK11;STK11;ortholog	SERINE/THREONINE-PROTEIN KINASE STK11 (PTHR43895:SF25)
	PAFAH1B1	Platelet-activating factor acetylhydrolase IB subunit alpha;PAFAH1B1;ortholog	PLATELET-ACTIVATING FACTOR ACETYLHYDROLASE IB SUBUNIT ALPHA (PTHR44129:SF1)
	ZDHHC11	Palmitoyltransferase ZDHHC11;ZDHHC11;ortholog	PALMITOYLTRANSFERASE ZDHHC11-RELATED (PTHR22883:SF22)
	TPGS1	Tubulin polyglutamylase complex subunit 1;TPGS1;ortholog	TUBULIN POLYGLUTAMYLASE COMPLEX SUBUNIT 1 (PTHR31932:SF2)
	TRIM40	Tripartite motif-containing protein 40;TRIM40;ortholog	E3 UBIQUITIN-PROTEIN LIGASE RNF187-RELATED (PTHR24103:SF564)

## Sheet: Supplementary data 2
Statistical overrepresentation test of the genes identified in the AGS and GLGS-UGLI cohorts.
AGS
	# Genes	Fold Enrichment	Direction (+/-)	P-value	Gene
GO Cellular component
Hemidesmosome	2	> 100	+	0.0256	EPKK1, PLEC
PANTHER GO-Slim Cellular Component
Intermediate filament	2	> 100	+	0.0186	EPKK1, PLEC
PANTHER Protein class
Intermediate filament binding protein	2	100	+	0.0119	EPKK1, PLEC
GLGS-UGLI
	# Genes	Fold Enrichment	Direction (+/-)	P-value	Gene
GO Biological process
Antigen processing and presentation of endogenous peptide antigen via MHC class I via ER pathway, TAP-independent	3	> 100	+	0.0121	HLA-A, HLA-G, HLA-H
Interferon-gamma-mediated signaling pathway	5	33.67	+	0.00468	HLA-A, HLA-G, HLA-H,HLA-DRB1, HLA-DRB5
Homophilic cell adhesion via plasma membrane adhesion molecules	10	29.04	+	2.02e-08	PCDHA1, PCDHA2, PCDHA3, PCDHA4, PCDHA5, PCDHA6, PCDHA7, PCDHA8, PCDHA9, PCDHA10
Regulation of mitotic cell cycle	9	7.31	+	0.0291	FOXG1, MSH2, PTEN, ATM, APC, KIF20B, HRAS, PLK4, CEP290
Nervous system development	19	4.18	+	0.000175	PCDHA6, PCDHA2, PCDHA4, PCDHA7, FOXG1, NRG3, PCDHA10, PCDHA3, PCDHA8, PTEN, PCDHA5, PCDHA1, ATM, APC, KIF20B, ARHGAP11B, COL3A1, MFSD8, CEP290
GO Molecular function
Peptide antigen binding	5	78.21	+	3.01e-05	HLA-A, HLA-G, HLA-H,HLA-DRB1, HLA-DRB5
Calcium ion binding	10	62	+	0.00581	PCDHA1, PCDHA2, PCDHA3, PCDHA4, PCDHA5, PCDHA6, PCDHA7, PCDHA8, PCDHA9, PCDHA10
GO cellular component complete
MHC class I protein complex	3	>100	+	0.0026	HLA-A, HLA-G, HLA-H
Integral component of lumenal side of endoplasmic reticulum membrane	5	83.6	+	1.14e-05	HLA-A, HLA-G, HLA-H,HLA-DRB1, HLA-DRB5
ER to Golgi transport vesicle membrane	5	39.75	+	0.000349	HLA-A, HLA-G, HLA-H,HLA-DRB1, HLA-DRB5
Endocytic vesicle membrane	6	14.84	+	0.00507	HLA-A, HLA-G, HLA-H,HLA-DRB1, HLA-DRB5, CFTR
Integral component of plasma membrane	19	5.56	+	2.47e-07	PCDHA6, PCDHA9, HLA-DRB1, CHRFAM7A, PCDHA2, PCDHA4, PCDHA7, NRG3, PCDHA10, CFTR, PCDHA3, PCDHA8, SCN1A, PCDHA5, PCDHA1, RHD, HLA-A, GJC1, HLA-H
PANTHER GO-Slim Biological Process
T cell mediated immunity	3	> 100	+	0.00764	HLA-A, HLA-G, HLA-H
Cell adhesion	10	16.22	+	9.22e-07	PCDHA1, PCDHA2, PCDHA3, PCDHA4, PCDHA5, PCDHA6, PCDHA7, PCDHA8, PCDHA9, PCDHA10
PANTHER GO-Slim Cellular Component
Integral component of plasma membrane	13	9.67	+	1.98e-07	PCDHA6, PCDHA9, CHRFAM7A, PCDHA2, PCDHA4, PCDHA7, PCDHA10, PCDHA3, PCDHA8, SCN1A, PCDHA5, PCDHA1, RHD
Reactome pathways
Endosomal/Vacuolar pathway	3	> 100	+	0.00751	HLA-A, HLA-G, HLA-H
Interferon gamma signaling	5	26.64	+	0.0032	HLA-A, HLA-G, HLA-H,HLA-DRB1, HLA-DRB5
